# Supplementary material
Source: Elsevier journal article supplement (https://www.sciencedirect.com/science/article/pii/S2341192921001463)
Supplement: mmc1 [file S2341192921001463:mmc1.docx]

ANEXO 1

GRUPO DE TRABAJO COVID, HOSPITAL UNIVERSITARIO DE SALAMANCA –IBSAL.

Jesús F Bermejo-Martín MD, PhD. Grupo de investigación biomédica en sepsis (BioSepsis), IBSAL. Departamento de Medicina. Universidad de Salamanca.

Cristina Doncel. Grupo de investigación biomédica en sepsis (BioSepsis), IBSAL. Departamento de Medicina. Universidad de Salamanca.

José María BastidaMD, PhD. Departamento de Hematología, Hospital Universitario de Salamanca-IBSAL. Departamento de Medicina. Universidad de Salamanca.

Azucena Hernández-Valero MD. Departamento de Anestesiología y Reanimación, Hospital Universitario de Salamanca-IBSAL. Departamento de Medicina. Universidad de Salamanca.

Carolina Jambrina-García Montoto MD. Departamento de Anestesiología y Reanimación, Hospital Universitario de Salamanca-IBSAL. Departamento de Medicina. Universidad de Salamanca.

José Sánchez-Crespo MD. Departamento de Anestesiología y Reanimación, Hospital Universitario de Salamanca-IBSAL. Departamento de Medicina. Universidad de Salamanca.

Pablo Alonso-Hernández MD, PhD. Departamento de Anestesiología y Reanimación, Hospital Universitario de Salamanca-IBSAL. Departamento de Medicina. Universidad de Salamanca.

Domingo Bustos-García MD. Departamento de Anestesiología y Reanimación, Hospital Universitario de Salamanca-IBSAL. Departamento de Medicina. Universidad de Salamanca.

Antonio Rodríguez-Calvo MD, PhD. Departamento de Anestesiología y Reanimación, Hospital Universitario de Salamanca-IBSAL. Departamento de Medicina. Universidad de Salamanca.

Raúl AlzibeíroMD. Departamento de Hematología, Hospital Universitario de Salamanca-IBSAL. Departamento de Medicina. Universidad de Salamanca.

Alberto Hernández-Sánchez MD. Departamento de Hematología, Hospital Universitario de Salamanca-IBSAL. Departamento de Medicina. Universidad de Salamanca.

Rocío Eiros MD. Departamento de Cardiología, Hospital Universitario de Salamanca-IBSAL. Departamento de Medicina. Universidad de Salamanca.

M Carmen Vargas MD,PhD. Departamento de Anestesiología y Reanimación, Hospital Universitario de Salamanca-IBSAL. Departamento de Medicina. Universidad de Salamanca.

María Ángeles Martín MD. Departamento de Anestesiología y Reanimación, Hospital Universitario de Salamanca-IBSAL. Departamento de Medicina. Universidad de Salamanca.

Teresa López MD. Departamento de Anestesiología y Reanimación, Hospital Universitario de Salamanca-IBSAL. Departamento de Medicina. Universidad de Salamanca.

José Alfonso Sastre MD, PhD. Departamento de Anestesiología y Reanimación, Hospital Universitario de Salamanca-IBSAL. Departamento de Medicina. Universidad de Salamanca.

José Carlos Garzón MD, PhD. Departamento de Anestesiología y Reanimación, Hospital Universitario de Salamanca-IBSAL. Departamento de Medicina. Universidad de Salamanca.

José Luis González MD. Departamento de Anestesiología y Reanimación, Hospital Universitario de Salamanca-IBSAL. Departamento de Medicina. Universidad de Salamanca.

Mar Fernández MD. Departamento de Anestesiología y Reanimación, Hospital Universitario de Salamanca-IBSAL. Departamento de Medicina. Universidad de Salamanca.

Belén García MD. Departamento de Anestesiología y Reanimación, Hospital Universitario de Salamanca-IBSAL. Departamento de Medicina. Universidad de Salamanca.

M Magdalena Muñoz MD. Departamento de Anestesiología y Reanimación, Hospital Universitario de Salamanca-IBSAL. Departamento de Medicina. Universidad de Salamanca.

María Isabel Martínez MD. Departamento de Anestesiología y Reanimación, Hospital Universitario de Salamanca-IBSAL. Departamento de Medicina. Universidad de Salamanca.

Gonzalo García MD. Departamento de Anestesiología y Reanimación, Hospital Universitario de Salamanca-IBSAL. Departamento de Medicina. Universidad de Salamanca.

Agustín Díaz MD, PhD. Departamento de Anestesiología y Reanimación, Hospital Universitario de Salamanca-IBSAL. Departamento de Medicina. Universidad de Salamanca.

Edgard MarcanoMD. Departamento de Medicina de Cuidados Intensivos, Hospital Universitario de Salamanca-IBSAL. Departamento de Medicina. Universidad de Salamanca.
